# Supplementary material
Source: PubMed Central journal article supplement (PMC3911837)
Supplement: IAI.00972-13_zii999090466so1.pdf [file IAI.00972-13_zii999090466so1.pdf]

**Supplementary Table 1:** Minor allele frequency of Q223R polymorphism among different populations

|                         | <b>Minor allele frequency</b> |
|-------------------------|-------------------------------|
| Whites                  | 0.40                          |
| Blacks                  | 0.55                          |
| YRI (Yoruba)            | 0.59                          |
| ASW (African Southwest) | 0.61                          |
| LWK (Kenya)             | 0.45                          |
| CUE (US Whites)         | 0.47                          |
| TSI (Italians)          | 0.44                          |
| GBR (Great Britain)     | 0.39                          |
| IBS (Iberian)           | 0.39                          |

<http://www.1000genomes.org/>
