# Supplementary material
Source: PubMed Central journal article supplement (PMC3911837)
Supplement: IAI.00972-13_zii999090466so2.pdf [file IAI.00972-13_zii999090466so2.pdf]

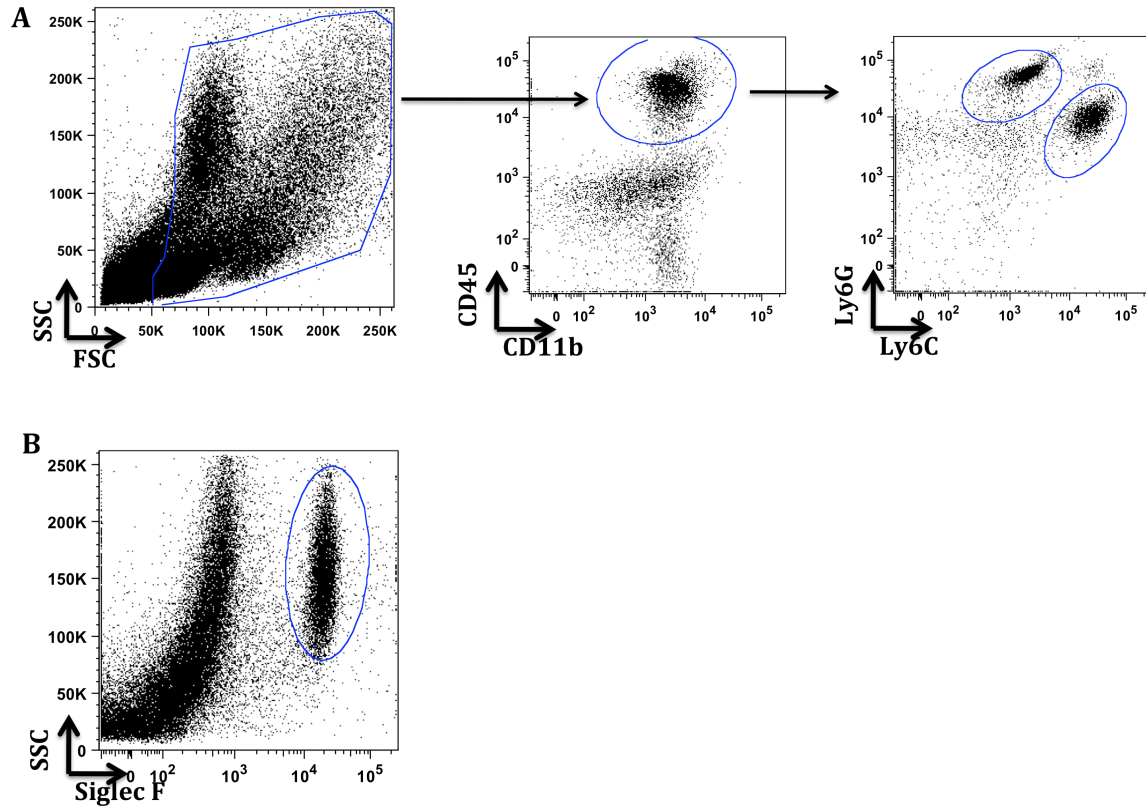

**Supplementary Figure 1. Gating strategy for flow cytometry data.**

A. Gating for neutrophils and monocytes, B. Gating for eosinophils.
